# Supplementary material for: Integrative Analysis of the DICER-like (DCL) Genes From Peach (Prunus persica): A Critical Role in Response to Drought Stress
Source: Frontiers journal article supplement (doi:10.3389/fevo.2022.923166), 2022-07-11
Supplement: Table_2.XLSX [file Table_2.XLSX]

## Sheet: Sheet1
Species	DCLs	Chr. No.	Chr. Length	Pos. (From-to)									Species	Chr no.	Length	Chr. Length	Total chr. L
Arabidopsis thaliana	AT1G01040	1	34964571	23416	31120								AT	1	34964571	34.9646
Arabidopsis thaliana	AT1G80650	1	34964571	30314522	30316002									2	22037565	22.0376
Arabidopsis thaliana	AT3G03300	3	25499034	767926	776214									3	25499034	25.499
Arabidopsis thaliana	AT3G20420	3	25499034	7119191	7121023									4	20862711	20.8627
Arabidopsis thaliana	AT3G43920	3	25499034	15753548	15760830									5	31270811	31.2708	134.635
Arabidopsis thaliana	AT4G00420	4	20862711	181274	184469								PAm	1	24250751	24.2508
Arabidopsis thaliana	AT4G15417	4	20862711	8821651	8823076									2	42984470	42.9845
Arabidopsis thaliana	AT5G20320	5	31270811	6859212	6869266									3	25125992	25.126
Arabidopsis thaliana	AT5G45150	5	31270811	18260441	18264431									4	25853656	25.8537
Prunus armeniaca	PARG03276m01	1	1194851	24105028	24116477									5	26681607	26.6816
Prunus armeniaca	PARG07485m01	2	1174239	30582898	30595667									6	20252323	20.2523
Prunus armeniaca	PARG10317m01	3	873106	9288529	9291507									7	18857615	18.8576
Prunus armeniaca	PARG10318m01	3	873106	9293596	9296065									8	22089871	22.0899	206.096
Prunus armeniaca	PARG10319m01	3	873106	9305984	9307412								Rch	1	64770848	64.7708
Prunus armeniaca	PARG13777m01	4	852201	6599148	6600672									2	75129302	75.1293
Prunus armeniaca	PARG18582m01	5	737485	19491995	19501399									3	46843630	46.8436
Prunus armeniaca	PARG20479m01	6	705126	3870212	3878692									4	59004735	59.0047
Prunus armeniaca	PARG26002m01	8	627929	6007756	6024585									5	85885663	85.8857
Prunus armeniaca	PARG28161m01	8	627929	21048930	21061307									6	67395200	67.3952
Rosa chinensis	Rcg0361361	1	64770848	53342837	53352195									7	67081725	67.0817	466.111
Rosa chinensis	Rcg0086421	2	75129302	1581834	1595215								Gtr	1	46305054	46.3051
Rosa chinensis	Rcg0158531	2	75129302	74804826	74806798									2	32680979	32.681
Rosa chinensis	Rcg0447571	3	46843630	232685	241890									3	27719576	27.7196
Rosa chinensis	Rcg0040511	5	85885663	35199256	35200680									4	33455105	33.4551
Rosa chinensis	Rcg0040931	5	85885663	35561932	35564562									5	29393837	29.3938
Rosa chinensis	Rcg0040941	5	85885663	35593332	35595860									6	26610424	26.6104
Rosa chinensis	Rcg0284721	6	67395200	48073740	48082027									7	30586256	30.5863
Rosa chinensis	Rcg0312121	6	67395200	68828384	68837990									8	23036381	23.0364
Rosa chinensis	Rcg0189841	7	67081725	9162746	9164005									9	22301293	22.3013	272.089
Rosa chinensis	Rcg0236301	7	67081725	61151837	61156163								Roc	1	34303927	34.3039
Rubus occidentalis	Ro01G05100	1	34303927	724883	744279									2	40759723	40.7597
Rubus occidentalis	Ro02G04571	2	40759723	5013330	5023579									3	43770452	43.7705
Rubus occidentalis	Ro02G19685	2	40759723	11611804	11621593									4	38749748	38.7497
Rubus occidentalis	Ro03G17209	3	43770452	27627367	27631457									5	41098493	41.0985
Rubus occidentalis	Ro03G17210	3	43770452	27610905	27612655									6	50857734	50.8577
Rubus occidentalis	Ro03G17213	3	43770452	27589164	27606234									7	41284720	41.2847	290.825
Rubus occidentalis	Ro05G01907	5	41098493	4719281	4720759								Prd	1	43996934	43.9969
Rubus occidentalis	Ro05G07364	5	41098493	12471049	12480637									2	26138581	26.1386
Rubus occidentalis	Ro06G06709	6	50857734	21307225	21309193									3	24073526	24.0735
Rubus occidentalis	Ro06_G14366	6	50857734	18536064	18547083									4	24375383	24.3754
Rubus occidentalis	Ro06_G28261	6	50857734	9351568	9352720									5	18233718	18.2337
Rubus occidentalis	Ro06_G28732	6	50857734	24490467	24501374									6	29596931	29.5969
Rubus occidentalis	Ro07_G20422	7	41284720	673857	683803									7	21340587	21.3406
Prunus dulcis	Prudul26A002319	6	29596931	29350412	29360408									8	20428636	20.4286	208.184
Prunus dulcis	Prudul26A006390	7	21340587	7145719	7151040								Prp	1	47851208	47.8512
Prunus dulcis	Prudul26A013521	7	21340587	7151919	7162920									2	30405870	30.4059
Prunus dulcis	Prudul26A016708	3	24073526	18894713	18896221									3	27368013	27.368
Prunus dulcis	Prudul26A017452	1	43996934	32063803	32079394									4	25843236	25.8432
Prunus dulcis	Prudul26A020901	8	20428636	16787796	16796450									5	18496696	18.4967
Prunus dulcis	Prudul26A022109	2	26138581	19442051	19451461									6	30767194	30.7672
Prunus dulcis	Prudul26A023796	7	21340587	20244885	20257824									7	22388614	22.3886
Prunus dulcis	Prudul26A029426	4	24375383	14139159	14140060									8	22573980	22.574	225.695
Prunus dulcis	Prudul26A032048	3	24073526	6917771	6920637								Frv	1	24253023	24.253
Prunus persica	Prupe.1G401900	1	47851208	35456786	35468115									2	29351230	29.3512
Prunus persica	Prupe.2G200900	2	30405870	23762166	23772469									3	38324302	38.3243
Prunus persica	Prupe.3G095800	3	27368013	7182432	7185802									4	33907851	33.9079
Prunus persica	Prupe.3G213200	3	27368013	21718024	21720295									5	29430145	29.4301
Prunus persica	Prupe.4G219200	4	25843236	13787080	13789315									6	39795230	39.7952
Prunus persica	Prupe.4G219300	4	25843236	13789348	13791624									7	24229589	24.2296	219.291
Prunus persica	Prupe.4G219400	4	25843236	13792137	13793035								Pyb	1	1194851	11.9485
Prunus persica	Prupe.4G219500	4	25843236	13794015	13798795									2	1174239	11.7424
Prunus persica	Prupe.4G219600	4	25843236	13799183	13801327									3	873106	8.73106
Prunus persica	Prupe.4G219700	4	25843236	13807289	13809101									4	852201	8.52201
Prunus persica	Prupe.6G363600	6	30767194	30547664	30558666									5	737485	7.37485
Prunus persica	Prupe.7G047700	7	22388614	8457811	8464704									6	705126	7.05126
Prunus persica	Prupe.7G047900	7	22388614	8465187	8471404									7	646974	6.46974
Prunus persica	Prupe.7G048000	7	22388614	8471883	8476896									8	627929	6.27929
Prunus persica	Prupe.7G252800	7	22388614	21319142	21332373									9	596275	5.96275
Prunus persica	Prupe.8G202000	8	22573980	19052450	19061495									10	564124	5.64124
Malus x domestica	HF30274-RA	15	56644392	11742630	11753048	MDP0000767313	HF31597-RA	MDP0000194327	HF31597-RA	4	31012745	30664164	30679873	11	562795	5.62795
Malus x domestica	HF03470-RA	11	42456296	30084787	30086519	MDP0000164658	HF30274-RA	MDP0000619907	HF30274-RA	15	56644392	11742630	11753048	12	562267	5.62267
Malus x domestica	HF29349-RA	17	33998825	8749369	8751004	MDP0000268554	HF30274-RA	MDP0000411671	HF30274-RA	15	56644392	11742630	11753048	13	552973	5.52973
Malus x domestica	HF21246-RA	8	31511015	3185951	3196633	MDP0000237286	HF30274-RA	MDP0000120528	HF30274-RA	15	56644392	11742630	11753048	14	545249	5.45249
Malus x domestica	HF05621-RA	1	32944118	21052478	21061418	MDP0000316580	HF29838-RA	MDP0000263070	HF29838-RA	10	43815376	26819970	26827854	15	531459	5.31459
Malus x domestica	HF29349-RA	17	33998825	8749369	8751004	MDP0000194327	HF29349-RA	MDP0000169234	HF29349-RA	17	33998825	8749369	8751004	16	498690	4.9869
Malus x domestica	HF31597-RA	4	31012745	30664164	30679873	MDP0000263070	HF29349-RA	MDP0000128997	HF29349-RA	17	33998825	8749369	8751004	17	487916	4.87916
Malus x domestica	HF05621-RA	1	32944118	21052478	21061418	MDP0000308156	HF21246-RA	MDP0000155170	HF21246-RA	8	31511015	3185951	3196633	18	485984	4.85984
Malus x domestica	HF33750-RA	9	34800404	8253691	8256504	MDP0000155170	HF20559-RA	MDP0000316580	HF20559-RA	14	31515206	9863509	9877023	19	476725	4.76725
Malus x domestica	HF32535-RA	17	33998825	26807678	26809074	MDP0000120528	HF20559-RA	MDP0000277038	HF20559-RA	14	31515206	9863509	9877023	20	473699	4.73699
Malus x domestica	HF03470-RA	11	42456296	30084787	30086519	MDP0000411671	HF13303-RA	MDP0000308156	HF13303-RA	15	56644392	3281917	3301223	21	465372	4.65372
Malus x domestica	HF29838-RA	10	43815376	26819970	26827854	MDP0000619907	HF05621-RA	MDP0000767313	HF05621-RA	1	32944118	21052478	21061418	22	463487	4.63487
Malus x domestica	HF05621-RA	1	32944118	21052478	21061418	MDP0000169234	HF05621-RA	MDP0000268554	HF05621-RA	1	32944118	21052478	21061418	23	459406	4.59406
Malus x domestica	HF20559-RA	14	31515206	9863509	9877023	MDP0000128997	HF05621-RA	MDP0000237286	HF05621-RA	1	32944118	21052478	21061418	24	454148	4.54148
Malus x domestica	HF13303-RA	15	56644392	3281917	3301223	MDP0000659071	HF05621-RA	MDP0000164658	HF05621-RA	1	32944118	21052478	21061418	25	432519	4.32519
Malus x domestica	HF20559-RA	14	31515206	9863509	9877023	MDP0000248673								26	431535	4.31535
Malus x domestica	HF30274-RA	15	56644392	11742630	11753048									27	427047	4.27047
Malus x domestica	HF04289-RA	3	37138690	26666274	26669974									28	422776	4.22776
Malus x domestica	HF30274-RA	15	56644392	11742630	11753048									29	418361	4.18361
Malus x domestica	HF04289-RA	3	37138690	26666274	26669974									30	410091	4.10091	175.348
Malus x domestica	HF33750-RA	9	34800404	8253691	8256504								M×Do	1	32944118	32.9441
Malus x domestica	HF05621-RA	1	32944118	21052478	21061418									2	38449405	38.4494
Fragaria vesca	Frv1g01480	1	24253023	774802	787119									3	37138690	37.1387
Fragaria vesca	Frv2g18930	2	29351230	16120223	16128487									4	31012745	31.0127
Fragaria vesca	Frv2g30780	2	29351230	23755878	23765432									5	47891858	47.8919
Fragaria vesca	Frv3g23250	3	38324302	16316866	16319452									6	35567198	35.5672
Fragaria vesca	Frv5g08550	5	29430145	4924679	4926531									7	35934761	35.9348
Fragaria vesca	Frv6g00200	6	39795230	152041	161520									8	31511015	31.511
Fragaria vesca	Frv6g42650	6	39795230	33190186	33192558									9	34800404	34.8004
Fragaria vesca	Frv7g17920	7	24229589	15080110	15089980									10	43815376	43.8154
Pyrus communis	pycom01g11560	1	1194851	12559735	12567397									11	42456296	42.4563
Pyrus communis	pycom03g14820	3	23577653	16152453	16157338									12	32285079	32.2851
Pyrus communis	pycom03g14830	3	23577653	16159371	16160958									13	44866511	44.8665
Pyrus communis	pycom04g21800	4	23003065	22794339	22799537									14	31515206	31.5152
Pyrus communis	pycom07g15740	7	27725576	18276045	18281479									15	56644392	56.6444
Pyrus communis	pycom08g03830	8	21220361	2919459	2923894									16	41670059	41.6701
Pyrus communis	pycom08g03840	8	21220361	2924288	2930103									17	33998825	33.9988	652.502
Pyrus communis	pycom09g03630	9	20860181	2683543	2685651
Pyrus communis	pycom11g18730	11	29989838	20912956	20915447
Pyrus communis	pycom11g18740	11	29989838	20916769	20925166
Pyrus communis	pycom11g18750	11	29989838	20926617	20928360
Pyrus communis	pycom12g07520	12	24686384	7946455	7950076
Pyrus communis	pycom14g07170	14	21737443	7180140	7183892
Pyrus communis	pycom15g04670	15	39171713	2767094	2771462
Pyrus communis	pycom15g14140	15	39171713	9625036	9635325		2	24780778
Pyrus communis	pycom17g09640	17	26287332	7328867	7330320		5	32246503
Pyrus communis	pycom17g22500	17	26287332	20862661	20863898		6	24259775
							10	29591706
							13	26819073
							16	28945450

## Sheet: Sheet2
Rubus occidentalis	Ro07_G20422	7	41284720	673857	683803
Rosa chinensis	Rcg0361361	1	64770848	53342837	53352195
Fragaria vesca	Frv7g17920	7	24229589	15080110	15089980
Prunus armeniaca	PARG18582m01	5	737485	19491995	19501399
Prunus persica	Prupe.2G200900	2	30405870	23762166	23772469
Prunus dulcis	Prudul26A022109	2	26138581	19442051	19451461
Pyrus communis	pycom01g11560	1	1194851	12559735	12567397
Malus x domestica	MDP0000767313	1	32944118	20653300	20662517
Pyrus communis	pycom01g11560	1	1194851	12559735	12567397
Malus x domestica	MDP0000164658	1	32625452	20653300	20662517
Malus x domestica	MDP0000268554	1	32944118	21052478	21061418
Malus x domestica	MDP0000237286	1	32944118	21052478	21061418
Pyrus communis	pycom14g07170	14	21737443	7180140	7183892
Malus x domestica	MDP0000316580	14	31515206	9863509	9877023
Pyrus communis	pycom12g07520	12	24686384	7946455	7950076
Prunus dulcis	Prudul26A006390	7	21340587	7145719	7151040
Prunus persica	Prupe.7G047700	7	22388614	8457811	8464704
Prunus persica	Prupe.7G048000	7	22388614	8471883	8476896
Prunus armeniaca	PARG26002m01	8	627929	6007756	6024585
Prunus dulcis	Prudul26A013521	7	21340587	7151919	7162920
Prunus persica	Prupe.7G047900	7	22388614	8465187	8471404
Rubus occidentalis	Ro05G07364	5	41098493	12471049	12480637
Rubus occidentalis	Ro06_G14366	6	50857734	18536064	18547083
Rubus occidentalis	Ro06_G28732	6	50857734	24490467	24501374
Rosa chinensis	Rcg0447571	3	46843630	232685	241890
Fragaria vesca	Frv6g00200	6	39795230	152041	161520
Pyrus communis	pycom04g21800	4	23003065	22794339	22799537
Malus x domestica	MDP0000194327	4	31012745	30664164	30679873
Prunus armeniaca	PARG03276m01	1	1194851	24105028	24116477
Prunus persica	Prupe.6G363600	6	30767194	30547664	30558666
Prunus dulcis	Prudul26A002319	6	29596931	29350412	29360408
Rubus occidentalis	Ro02G19685	2	40759723	11611804	11621593
Fragaria vesca	Frv2g18930	2	29351230	16120223	16128487
Rosa chinensis	Rcg0284721	6	67395200	48073740	48082027
Malus x domestica	MDP0000263070	10	43815376	26819970	26827854
Prunus armeniaca	PARG20479m01	6	705126	3870212	3878692
Prunus dulcis	Prudul26A020901	8	20428636	16787796	16796450
Prunus persica	Prupe.8G202000	8	22573980	19052450	19061495
Rubus occidentalis	Ro02G04571	2	40759723	5013330	5023579
Rosa chinensis	Rcg0312121	6	67395200	68828384	68837990
Fragaria vesca	Frv2g30780	2	29351230	23755878	23765432
Prunus armeniaca	PARG07485m01	2	1174239	30582898	30595667
Prunus dulcis	Prudul26A017452	1	43996934	32063803	32079394
Prunus persica	Prupe.1G401900	1	47851208	35456786	35468115
Pyrus communis	pycom15g04670	15	39171713	2767094	2771462
Malus x domestica	MDP0000308156	15	56644392	3281917	3301223
Pyrus communis	pycom08g03840	8	21220361	2924288	2930103
Malus x domestica	MDP0000155170	8	31511015	3185951	3196633
Pyrus communis	pycom08g03830	8	21220361	2919459	2923894
Rubus occidentalis	Ro01G05100	1	34303927	724883	744279
Fragaria vesca	Frv1g01480	1	24253023	774802	787119
Rosa chinensis	Rcg0086421	2	75129302	1581834	1595215
Prunus armeniaca	PARG28161m01	8	627929	21048930	21061307
Prunus persica	Prupe.7G252800	7	22388614	21319142	21332373
Prunus dulcis	Prudul26A023796	7	21340587	20244885	20257824
Malus x domestica	MDP0000120528	15	56644392	11742630	11753048
Pyrus communis	pycom15g14140	15	39171713	9625036	9635325
Malus x domestica	MDP0000411671	15	56644392	11742630	11753048
Malus x domestica	MDP0000619907	15	56644392	11742630	11753048
